# Supplementary material
Source: PubMed Central journal article supplement (PMC5746566)
Supplement: rsif20170563supp1.pdf [file rsif20170563supp1.pdf]

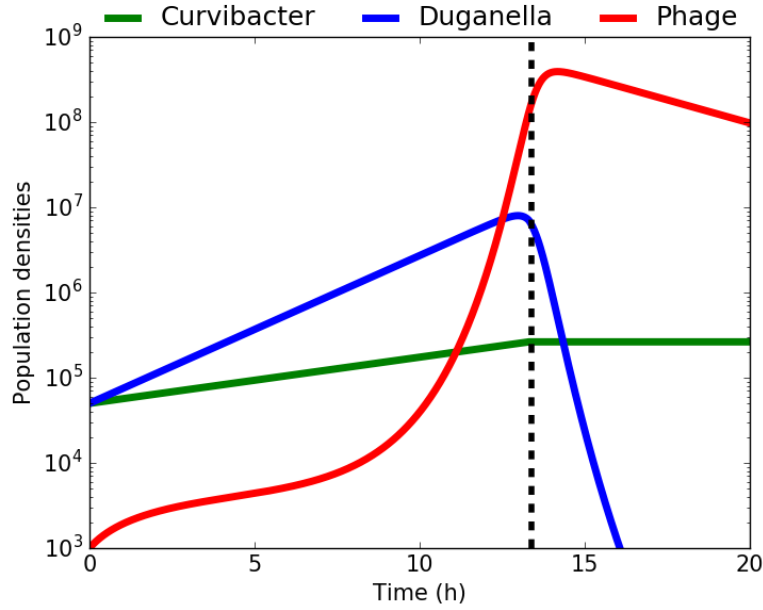

**Suppl. Fig. 1** Typical population dynamics obtained from model (2). Both bacteria initially grow exponentially, until *Duganella* sp. growth declines due to lytic phage infections and *Curvibacter* sp. growth slows down due to depletion of nutrients, respectively. The vertical dashed line at  $t = t_{exp}$  indicates the end of the exponential growth phase, defined as the time when *Curvibacter* sp. growth ceases. *Duganella* sp. density approaches 0 after about 20 hours due to continued phage infections. Parameters values for this example:  $N_0 = 100$ ,  $B_0 = 10^5$ ,  $f_0 = 0.5$ ,  $P_0 = 10^3$ ,  $c = 10^{-5}$ ,  $r_C = 0.125$ ,  $r_D = 0.4$ ,  $H = 0.05$ ,  $\phi = 10^{-8}$ ,  $\beta = 50$ ,  $m = 0.25$ ,  $p = 0.05$ .
